# Supplementary material
Source: publisher figshare collection journal article supplement (https://karger.figshare.com/ndownloader/files/17937596)
Supplement: Supplementary file 1 [file 17937596]

**Supplemental Table 1: Primer sequences for qPCR**

| Gene | forward sequence | reverse sequence |
| --- | --- | --- |
| *Lhβ* | CTGTCAACGCAACTCTGG | ACAGGAGGCAAAGCAGC |
| *Gnrhr* | GCCCCTTGCTGTACAAAGC | CCGTCTGCTAGGTAGATCATCC |
| *Gapdh* | TGCACCACCAACTGCTTAG | GGATGCAGGGATGATGTTC |
| *Gr* | CAAAGCCGTTTCACTGTCC | ACAATTTCACACTGCCACC |
| *Kiss1* | CCCTTCCTCCCAGAATGATC | TCCCAGGCATTAACGAGTTC |
| *pDyn* | AGCAGTAAGCAGGTCATTCATCC | CACGCCATTCTGACTCACTTGT |
| *Tac2* | CGTGACATGCACGACTTC | CCAACAGGAGGACCTTAC |
| *Erα* | GCGCAAGTGTTACGAAGTG | TTCGGCCTTCCAAGTCATC |
| *Oprκ* | AACCAAAGCATCTGCCAAAG | ATTTGTGGTGGGCTTAGTGG |
| *Tac3r* | TACACCATCGTTGGAATTAC | ATGTCACCACCACAATAATC |
